# Supplementary material for: The STIM1/2-Regulated Calcium Homeostasis Is Impaired in Hippocampal Neurons of the 5xFAD Mouse Model of Alzheimer’s Disease
Source: MDPI journal article supplement (doi:10.3390/ijms232314810), 2022-11-26
Supplement: s1 [file s1]

## Supplement Figure S1

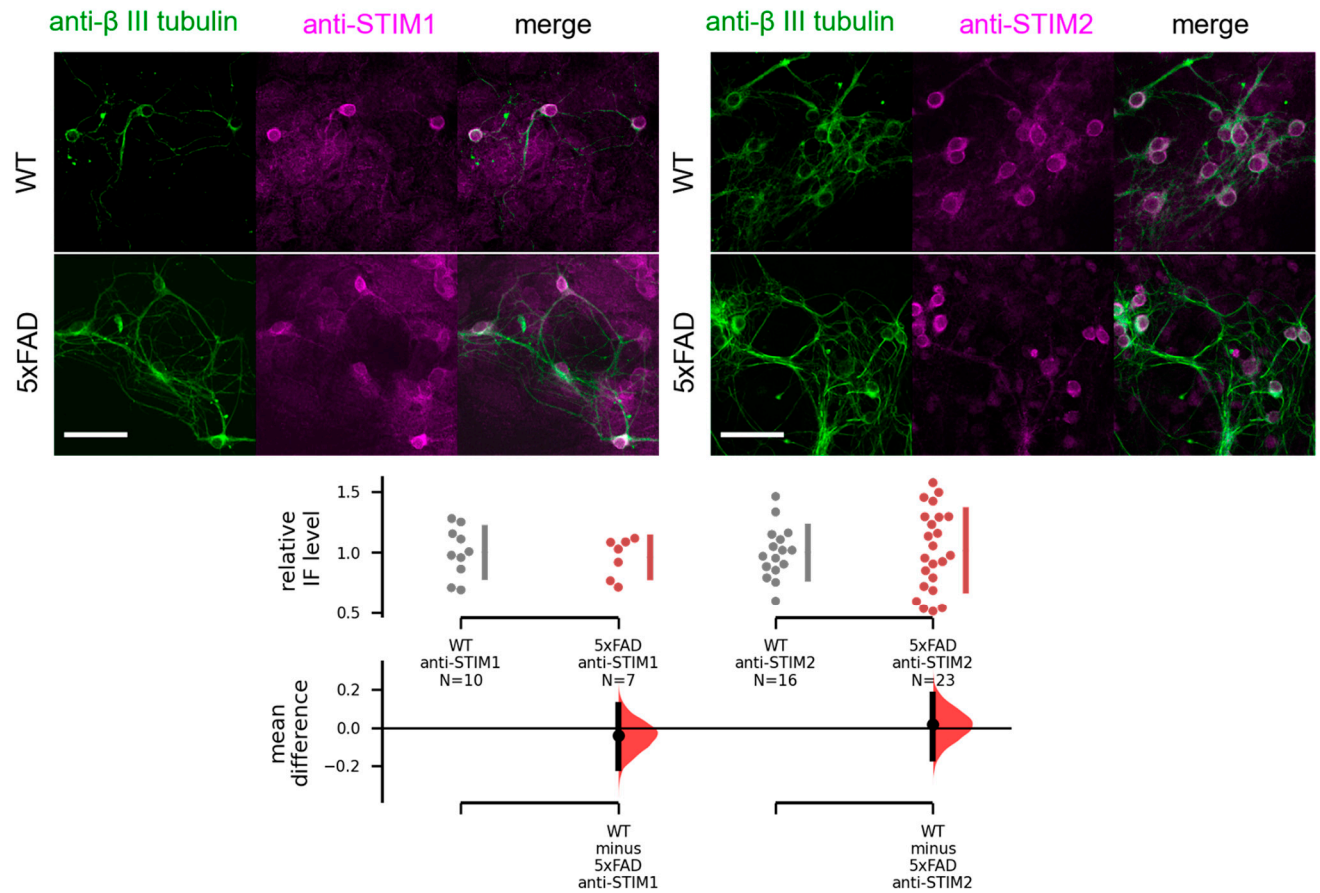

Confocal immunofluorescence images of neuronal cultures of wild-type (WT) and 5xFAD mice probed with anti-STIM1/2 (magenta, anti-STIM1 and anti-STIM2) and β-III neuro-tubulin antibodies (green, anti-β III neuro-tubulin). Scale bar is 50μm. Integrated immunofluorescence for anti-STIM1/2 staining was calculated for every neuron counterstained with anti-β III neuro-tubulin. Datasets were normalized to WT values to determine relative immunofluorescence (IF) levels. Normalized data are plotted on the upper axes; mean differences are plotted on floating axes on the bottom as a bootstrap sampling distribution. We found no significant differences between WT and 5xFAD cultures: mean differences were -0.04 ( $p = 0.67$ , t-test) for anti-STIM1 staining and 0.017 ( $p = 0.86$ , t-test) for anti-STIM2 staining.

Supplement Table S1. Statistical values and statistics for datasets in Figure 1-5. “diff” is short for difference.

| Type of Data                                                                                                                                                       | Mean±SEM   | N   | Statistics                                                           |
|--------------------------------------------------------------------------------------------------------------------------------------------------------------------|------------|-----|----------------------------------------------------------------------|
| <b>Figure 1 A</b> Normalized SOC entry values                                                                                                                      |            |     |                                                                      |
| WT                                                                                                                                                                 | 1.00±0.07  | 79  | p = 0.000002 (Mann-Whitney test)<br>difference (diff) = 0.42 (+42%)  |
| 5xFAD                                                                                                                                                              | 1.42±0.05  | 156 |                                                                      |
| <b>Figure 1 B</b> Normalized entry values after TPEN treatment                                                                                                     |            |     |                                                                      |
| WT                                                                                                                                                                 | 1.00±0.09  | 21  | p = 4.18e-07 (Mann-Whitney test)<br>diff = 1.31 (+131%)              |
| 5xFAD                                                                                                                                                              | 2.31±0.22  | 26  |                                                                      |
| <b>Figure 1 C</b><br>Normalized SOC entry values for WT or 5xFAD neurons treated with leflunomide (Lef),<br>teriflunomide (Ter), BTP2 or DMSO                      |            |     |                                                                      |
| WT + DMSO                                                                                                                                                          | 1.00±0.03  | 162 | KW ANOVA p = 5.83e-10,<br>Dunn's test p values in Suppl. Table<br>S2 |
| WT + Lef                                                                                                                                                           | 0.74±0.04  | 54  | diff = -0.25 (-25%) comp. with WT<br>DMSO                            |
| WT + Ter                                                                                                                                                           | 1.04±0.05  | 55  | diff = 0.04 (4%) comp with WT<br>DMSO                                |
| 5xFAD + DMSO                                                                                                                                                       | 1.22±0.08  | 53  |                                                                      |
| 5xFAD + Lef                                                                                                                                                        | 0.83±0.05  | 64  | diff = -0.40 (-32%) comp. with<br>5xFAD DMSO                         |
| 5xFAD + Ter                                                                                                                                                        | 0.85±0.05  | 40  | diff = -0.37 (-30%) comp. with<br>5xFAD DMSO                         |
| 5xFAD + BTP2                                                                                                                                                       | 0.66±0.06  | 31  | diff = -0.57 (-47%) comp. with<br>5xFAD DMSO                         |
| <b>Figure 2A</b><br>Relative expression levels calculated as densitometry of values for the target protein and<br>normalized to α-tubulin value (Western Blotting) |            |     |                                                                      |
| WT STIM1                                                                                                                                                           | 1.00±0.07  | 15  | diff = -0.03<br>p = 0.74 (t-test)                                    |
| 5xFAD STIM1                                                                                                                                                        | 0.97±0.07  | 14  |                                                                      |
| WT STIM2                                                                                                                                                           | 1.00±0.10  | 8   | diff = -0.04<br>p = 0.9 (t-test)                                     |
| 5xFAD STIM2                                                                                                                                                        | 0.96±0.28  | 6   |                                                                      |
| WT Orai1                                                                                                                                                           | 1.00±0.13  | 6   | diff = 0.2<br>p = 0.67 (t-test)                                      |
| 5xFAD Orai1                                                                                                                                                        | 1.20±0.52  | 4   |                                                                      |
| WT Orai2                                                                                                                                                           | 1.00±0.08  | 5   | diff = 0.05<br>p = 0.8 (t-test)                                      |
| 5xFAD Orai2                                                                                                                                                        | 1.05±0.21  | 4   |                                                                      |
| WT TRPC1                                                                                                                                                           | 1.00±0.17  | 6   | diff = -0.21<br>p = 0.38 (t-test)                                    |
| 5xFAD TRPC1                                                                                                                                                        | 0.79±0.12  | 4   |                                                                      |
| <b>Figure 2B</b><br>Raw resting calcium levels were measured as F340/F380                                                                                          |            |     |                                                                      |
| WT                                                                                                                                                                 | 0.36±0.004 | 185 | diff = 0.006<br>P = 0.75 (Mann-Whitney test)                         |
| 5xFAD                                                                                                                                                              | 0.37±0.003 | 252 |                                                                      |
| <b>Figure 2C</b><br>The normalized Ca2±release <b>peaks</b> of WT and 5xFAD neurons in response to thapsigargin (Tg)                                               |            |     |                                                                      |
| WT                                                                                                                                                                 | 1.0±0.2    | 28  | diff = -0.24<br>p = 0.04 (Mann-Whitney test)                         |

|                                                                                                                                  |             |     |                                                                |
|----------------------------------------------------------------------------------------------------------------------------------|-------------|-----|----------------------------------------------------------------|
| 5xFAD                                                                                                                            | 0.76±0.2    | 95  |                                                                |
| <b>Figure 2C</b><br><i>The normalized Ca2±release <b>AUC values</b> of WT and 5xFAD neurons in response to thapsigargin (Tg)</i> |             |     |                                                                |
| WT                                                                                                                               | 1.00± 0.14  | 28  | diff = -0.25<br>p = 0.03 (Mann-Whitney test)                   |
| 5xFAD                                                                                                                            | 0.88± 0.07  | 95  |                                                                |
| <b>Figure 2D</b><br><i>The normalized Ca2±release <b>peaks</b> of WT and 5xFAD neurons in response to ionomycin (Ion)</i>        |             |     |                                                                |
| WT                                                                                                                               | 1.0±0.09    | 39  | diff = 0.39<br>p = 0.009 (Mann-Whitney test)                   |
| 5xFAD                                                                                                                            | 1.39 ± 0.1  | 70  |                                                                |
| <b>Figure 2D</b><br><i>The normalized Ca2±release <b>AUC values</b> of WT and 5xFAD neurons in response to ionomycin (Ion)</i>   |             |     |                                                                |
| WT                                                                                                                               | 1.0 ± 0.13  | 39  | diff = 0.016<br>p = 0.84 (Mann-Whitney test)                   |
| 5xFAD                                                                                                                            | 1.02 ± 0.1  | 70  |                                                                |
| <b>Figure 2E</b><br><i>The normalized Ca2±release <b>peaks</b> of WT and 5xFAD neurons in response to caffeine (Caff)</i>        |             |     |                                                                |
| WT                                                                                                                               | 1.00±0.31   | 14  | diff = 0.22<br>p = 0.28 (Mann-Whitney test)                    |
| 5xFAD                                                                                                                            | 1.22±0.17   | 32  |                                                                |
| <b>Figure 2E</b><br><i>The normalized Ca2±release <b>AUC values</b> of WT and 5xFAD neurons in response to caffeine (Caff)</i>   |             |     |                                                                |
| WT                                                                                                                               | 1.00±0.11   | 14  | diff = -0.24<br>p = 0.84 (Mann-Whitney test)                   |
| 5xFAD                                                                                                                            | 0.76± 0.11  | 32  |                                                                |
| <b>Figure 3A</b><br><i>Normalized SOC entry values for WT and 5xFAD neurons with STIM1/STIM2 KD</i>                              |             |     |                                                                |
| WT                                                                                                                               | 1.0 ± 0.07  | 79  | KW ANOVA p = 2.14e-22<br>Dunn'test p values in Suppl. Table S3 |
| WT STIM1 KD                                                                                                                      | 1.15 ± 0.1  | 51  | diff = -0.15 (-15%) comp with WT                               |
| WT STIM2 KD                                                                                                                      | 0.48 ± 0.08 | 33  | diff = -0.52 (-52%) comp with WT                               |
| 5xFAD                                                                                                                            | 1.42 ± 0.05 | 156 |                                                                |
| 5xFAD STIM1 KD                                                                                                                   | 0.49 ± 0.09 | 15  | diff = -0.94 (-66%) comp with 5xFAD                            |
| 5xFAD STIM2 KD                                                                                                                   | 0.82 ± 0.09 | 62  | diff = -0.60 (-42%) comp with 5xFAD                            |
| <b>Figure 3B</b><br><i>Relative expression levels of STIM1/2 normalized to α-tubulin value (Western blotting)</i>                |             |     |                                                                |
| WT anti-STIM1                                                                                                                    | 1           | 9   | diff = -0.39 (-39%) p = 0.001 (paired t-test)                  |
| 5xFAD anti-STIM1                                                                                                                 | 0.61±0.08   | 9   |                                                                |
| WT anti-STIM2                                                                                                                    | 1           | 6   | diff = -0.44 (-44%) p = 0.003 (paired t-test)                  |

|                                                                                                                                                                                    |             |     |                                                               |
|------------------------------------------------------------------------------------------------------------------------------------------------------------------------------------|-------------|-----|---------------------------------------------------------------|
|                                                                                                                                                                                    |             |     | t-test)                                                       |
| 5xFAD anti-STIM2                                                                                                                                                                   | 0.56±0.09   | 6   |                                                               |
| <b>Figure 3C</b><br><i>Normalized Integrated immunofluorescence for anti-STIM1/2 staining</i>                                                                                      |             |     |                                                               |
| C3HA neurons Mock anti-STIM1                                                                                                                                                       | 1.0±0.02    | 38  | diff = -0.51 (-51%)<br>p = 1.40e-32 (t-test)                  |
| C3HA neurons STIM1 KD anti-STIM1                                                                                                                                                   | 0.49±0.01   | 41  |                                                               |
| C3HA neurons Mock anti-STIM2                                                                                                                                                       | 1.02±0.11   | 11  | diff = -0.57 (-57%)<br>p = 5.49e-05 (t-test)                  |
| C3HA neurons STIM2 KD anti-STIM2                                                                                                                                                   | 0.45±0.06   | 15  |                                                               |
| <b>Figure 4A</b><br><i>Normalized depolarization-induced Ca2+ entry <b>peak</b> values</i>                                                                                         |             |     |                                                               |
| WT                                                                                                                                                                                 | 1.0±0.04    | 106 | diff = 0.19 (+19%)<br>p = 1.6E-4 (Mann-Whitney test)          |
| 5xFAD                                                                                                                                                                              | 1.19±0.04   | 96  |                                                               |
| <b>Figure 4A</b><br><i>Normalized depolarization-induced Ca2+ entry <b>AUC</b> values</i>                                                                                          |             |     |                                                               |
| WT                                                                                                                                                                                 | 1.0±0.04    | 87  | diff = 0.17 (+17%)<br>p = 0.002 (Mann-Whitney test)           |
| 5xFAD                                                                                                                                                                              | 1.17±0.04   | 97  |                                                               |
| <b>Figure 4B</b><br><i>Normalized depolarization-induced Ca2+ entry <b>peak</b> values after TPEN treatment</i>                                                                    |             |     |                                                               |
| WT after TPEN                                                                                                                                                                      | 1.00±0.08   | 38  | diff = 0.013<br>p = 0.98 (Mann-Whitney test)                  |
| 5xFAD after TPEN                                                                                                                                                                   | 1.01±0.04   | 133 |                                                               |
| <b>Figure 4B</b><br><i>Normalized depolarization-induced Ca2+ entry <b>AUC</b> values after TPEN treatment</i>                                                                     |             |     |                                                               |
| WT after TPEN                                                                                                                                                                      | 1±0.07      | 37  | diff = 0.28<br>p = 0.006 (Mann-Whitney test)                  |
| 5xFAD after TPEN                                                                                                                                                                   | 1.28±0.05   | 133 |                                                               |
| <b>Figure 4B</b><br><i>Normalized depolarization-induced Ca2+ entry <b>AUC</b> values after TPEN treatment compared with WT and 5xFAD with replete stores (separate recording)</i> |             |     |                                                               |
| WT                                                                                                                                                                                 | 1.00±0.04   | 101 | KW ANOVA p =7.70e-44<br>Dunn's test values in Suppl. Table S4 |
| 5xFAD                                                                                                                                                                              | 1.60 ±0.03  | 288 |                                                               |
| WT after TPEN                                                                                                                                                                      | 0.73 ± 0.04 | 37  |                                                               |
| 5xFAD after TPEN                                                                                                                                                                   | 0.93 ± 0.04 | 133 |                                                               |
| <b>Figure 4C</b><br><i>Normalized depolarization-induced Ca2+ entry <b>peak</b> values in neurons treated with inhibitors</i>                                                      |             |     |                                                               |
| 5xFAD                                                                                                                                                                              | 1.16 ± 0.06 | 33  | KW ANOVA p = 1.28-05<br>Dunn's test values in Suppl. Table S5 |
| 5xFAD Nif                                                                                                                                                                          | 0.73±0.06   | 24  |                                                               |
| 5xFAD ML 218                                                                                                                                                                       | 0.85±0.04   | 28  |                                                               |
| <b>Figure 4C</b><br><i>Normalized depolarization-induced Ca2+ entry <b>AUC</b> values in neurons treated with inhibitors</i>                                                       |             |     |                                                               |
| 5xFAD                                                                                                                                                                              | 1.13 ± 0.05 | 33  | KW ANOVA p = 3.94-09<br>Dunn's test values in Suppl. Table S6 |
| 5xFAD Nif                                                                                                                                                                          | 0.55±0.05   | 24  |                                                               |
| 5xFAD ML 218                                                                                                                                                                       | 0.93±0.04   | 28  |                                                               |
| <b>Figure 5A</b><br><i>Normalized depolarization-induced Ca2+ entry <b>peak</b> values in neurons with STIM1/2 KD</i>                                                              |             |     |                                                               |
| WT                                                                                                                                                                                 | 1.0±0.04    | 106 | KW ANOVA p = 0.007                                            |

|                                                                                                                                             |             |    |                                                                 |
|---------------------------------------------------------------------------------------------------------------------------------------------|-------------|----|-----------------------------------------------------------------|
| WT STIM1 KD                                                                                                                                 | 1.09 ± 0.08 | 29 | Dunn's test values in Suppl. Table S7                           |
| WT STIM2 KD                                                                                                                                 | 1.29 ± 0.08 | 38 |                                                                 |
| <b>Figure 5A</b><br><i>Normalized depolarization-induced Ca2+ entry <b>AUC</b> values in neurons with STIM1/2 KD</i>                        |             |    |                                                                 |
| WT                                                                                                                                          | 1.0±0.04    | 87 | KW ANOVA p = 7.67 E-5<br>All pairwise Dunn's test p values = 1  |
| WT STIM1 KD                                                                                                                                 | 0.93 ± 0.06 | 29 |                                                                 |
| WT STIM2 KD                                                                                                                                 | 1.06 ± 0.11 | 38 |                                                                 |
| <b>Figure 5B</b><br><i>Normalized depolarization-induced Ca2+ entry <b>peak</b> values in neurons with STIM1/2 KD</i>                       |             |    |                                                                 |
| 5xFAD                                                                                                                                       | 1.19±0.04   | 96 | KW ANOVA p = 1.28e-05<br>Dunn's test values in Suppl. Table S8  |
| 5xFAD STIM1 KD                                                                                                                              | 1.28 ± 0.08 | 21 |                                                                 |
| 5xFAD STIM2 KD                                                                                                                              | 1.38±0.05   | 63 |                                                                 |
| <b>Figure 5B</b><br><i>Normalized depolarization-induced Ca2+ entry <b>AUC</b> values in neurons with STIM1/2 KD</i>                        |             |    |                                                                 |
| 5xFAD                                                                                                                                       | 1.17±0.04   | 97 | KW ANOVA p =3.94e-09<br>Dunn's test values in Suppl. Table S9   |
| 5xFAD STIM1 KD                                                                                                                              | 1.35 ± 0.1  | 21 |                                                                 |
| 5xFAD STIM2 KD                                                                                                                              | 1.44 ± 0.05 | 63 |                                                                 |
| <b>Figure 5C</b><br><i>Normalized depolarization-induced Ca2+ entry <b>peak</b> values in neurons with STIM1 KD treated with inhibitors</i> |             |    |                                                                 |
| 5xFAD STIM1 KD                                                                                                                              | 1.28 ± 0.08 | 21 | KW ANOVA p = 7.85e-07<br>Dunn's test values in Suppl. Table S10 |
| 5xFAD STIM1 KD + NIF                                                                                                                        | 0.76 ± 0.05 | 33 |                                                                 |
| 5xFAD STIM1 KD + ML                                                                                                                         | 0.68 ± 0.04 | 20 |                                                                 |
| <b>Figure 5C</b><br><i>Normalized depolarization-induced Ca2+ entry <b>AUC</b> values in neurons with STIM1 KD treated with inhibitors</i>  |             |    |                                                                 |
| 5xFAD STIM1 KD                                                                                                                              | 1.35 ± 0.1  | 21 | KW ANOVA p = 5.85e-09<br>Dunn's test values in Suppl. Table S11 |
| 5xFAD STIM1 KD + NIF                                                                                                                        | 0.62 ± 0.03 | 33 |                                                                 |
| 5xFAD STIM1 KD + ML                                                                                                                         | 0.68 ± 0.03 | 20 |                                                                 |
| <b>Figure 5D</b><br><i>Normalized depolarization-induced Ca2+ entry <b>peak</b> values in neurons with STIM2 KD treated with inhibitors</i> |             |    |                                                                 |
| 5xFAD STIM2 KD                                                                                                                              | 1.38±0.05   | 63 | KW ANOVA p = 0.0032<br>Dunn's test values in Suppl. Table S12   |
| 5xFAD STIM2 KD + NIF                                                                                                                        | 0.92 ± 0.05 | 9  |                                                                 |
| 5xFAD STIM2 KD + ML                                                                                                                         | 1.30 ± 0.09 | 20 |                                                                 |
| <b>Figure 5D</b><br><i>Normalized depolarization-induced Ca2+ entry <b>AUC</b> values in neurons with STIM2 KD treated with inhibitors</i>  |             |    |                                                                 |
| 5xFAD STIM2 KD                                                                                                                              | 1.44 ± 0.05 | 63 | KW ANOVA p = 5.19E-05<br>Dunn's test values in Suppl. Table S13 |
| 5xFAD STIM2 KD + NIF                                                                                                                        | 0.82 ± 0.04 | 9  |                                                                 |
| 5xFAD STIM2 KD + ML                                                                                                                         | 1.2 ± 0.08  | 20 |                                                                 |

Supplement Table S2. Dunn's test pair wise comparison for normalized SOC entry values for neurons with FDA-approved drugs (Figure 1C)

|  |              |             |             |                 |                |                |                 |
|--|--------------|-------------|-------------|-----------------|----------------|----------------|-----------------|
|  | WT<br>+ DMSO | WT<br>+ Lef | WT<br>+ Ter | 5xFAD<br>+ DMSO | 5xFAD<br>+ Lef | 5xFAD<br>+ Ter | 5xFAD<br>+ BTP2 |
|--|--------------|-------------|-------------|-----------------|----------------|----------------|-----------------|

|              |        |         |         |          |         |      |          |
|--------------|--------|---------|---------|----------|---------|------|----------|
| WT + DMSO    | 1      | 0.002   | 1       | 0.67     | 0.027   | 1.00 | 0.0017   |
| WT + Lef     | 0.002  | 1       | 0.0004  | 0.000013 | 1.00    | 1.00 | 1        |
| WT + Ter     | 1      | 0.0004  | 1       | 1        | 0.005   | 0.50 | 0.00032  |
| 5xFAD + DMSO | 0.67   | 0.00001 | 1       | 1        | 0.00024 | 0.07 | 0.000018 |
| 5xFAD + Lef  | 0.027  | 1       | 0.005   | 0.00024  | 1       | 1    | 1        |
| 5xFAD + Ter  | 1      | 1       | 0.50    | 0.07     | 1       | 1    | 0.76     |
| 5xFAD + BTP2 | 0.0017 | 1       | 0.00032 | 0.00     | 1       | 0.76 | 1        |

Supplement Table S3. Dunn's test pair wise comparison for normalized SOC in neurons with STIM1 or STIM2 knock down (KD) (Figure 1C)

|                   | WT       | WT STIM1<br>KD | WT STIM2<br>KD | 5xFAD    | 5xFAD<br>STIM1 KD | 5xFAD STIM2<br>KD |
|-------------------|----------|----------------|----------------|----------|-------------------|-------------------|
| WT                | 1        | 1              | 2.31E-04       | 2.87E-05 | 0.026             | 0.36              |
| WT<br>STIM1 KD    | 1        | 1              | 1.59E-05       | 0.06     | 0.004             | 0.034             |
| WT<br>STIM2 KD    | 2.31E-04 | 1.60E-05       | 1              | 7.71E-15 | 1                 | 0.25773           |
| 5xFAD             | 2.90E-05 | 0.06           | 0              | 1        | 1.78E-07          | 0                 |
| 5xFAD<br>STIM1 KD | 0.026    | 0.0036         | 1              | 1.78E-07 | 1                 | 1                 |
| 5xFAD<br>STIM2 KD | 0.36     | 0.034          | 0.25773        | 0        | 1                 | 1                 |

Supplement Table S4 Dunn's test pair wise comparison for normalized AUC values KCl responses for WT and 5xFAD neurons with replete and depleted (after TPEN treatment) calcium stores

|                  | WT       | WT after TPEN | 5xFAD    | 5xFAD after TPEN |
|------------------|----------|---------------|----------|------------------|
| WT               | 1        | 0.036         | 1.42E-17 | 1                |
| WT after TPEN    | 0.036    | 1             | 7.74E-18 | 0.15             |
| 5xFAD            | 1.42E-17 | 7.74E-18      | 1        | 7.79E-26         |
| 5xFAD after TPEN | 1        | 0.15          | 7.79E-26 | 1                |

Supplement Table S5. Dunn's test pair wise comparison for normalized **peak** values for 5xFAD neurons treated with nifedipine (Nif) and ML 218 (ML) (Figure 4C)

|  | 5xFAD + DMSO | 5xFAD + Nif | 5xFAD + ML |
|--|--------------|-------------|------------|
|--|--------------|-------------|------------|

|              |          |          |          |
|--------------|----------|----------|----------|
| 5xFAD + DMSO | 1        | 3.20E-05 | 1        |
| 5xFAD + Nif  | 3.20E-05 | 1        | 2.53E-04 |
| 5xFAD + ML   | 1        | 2.53E-04 | 1        |

Supplement Table S6. Dunn's test pair wise comparison for normalized AUC values for 5xFAD neurons treated with nifedipine (Nif) and ML 218 (ML) (Figure 4C)

|              | 5xFAD + DMSO | 5xFAD + Nif | 5xFAD + ML |
|--------------|--------------|-------------|------------|
| 5xFAD + DMSO | 1.00         | 1.85E-09    | 0.10       |
| 5xFAD + Nif  | 1.85E-09     | 1.00        | 1.86E-04   |
| 5xFAD + ML   | 0.10         | 1.86E-04    | 1.00       |

Supplement Table S7. Dunn's test pair wise comparison for normalized **peak** values for WT neurons treated with STIM1 or STIM2 KD (Figure 5A)

|          | WT    | WT STIM1 | WT STIM2 |
|----------|-------|----------|----------|
| WT       | 1     | 0.92     | 0.005    |
| WT STIM1 | 0.92  | 1        | 0.38     |
| WT STIM2 | 0.005 | 0.38     | 1        |

Supplement Table S8. Dunn's test pair wise comparison for normalized **peak** values for 5xFAD neurons with STIM1 KD (Figure 5B)

|                | 5xFAD | 5xFAD STIM1 KD | 5xFAD STIM2 KD |
|----------------|-------|----------------|----------------|
| 5xFAD          | 1     | 0.78           | 0.005          |
| 5xFAD STIM1 KD | 0.78  | 1              | 1              |
| 5xFAD STIM2 KD | 0.005 | 1              | 1              |

Supplement Table S9. Dunn's test pair wise comparison for normalized AUC values for 5xFAD neurons with STIM1 KD (Figure 5B)

|                | 5xFAD    | 5xFAD STIM1 KD | 5xFAD STIM2 KD |
|----------------|----------|----------------|----------------|
| 5xFAD          | 1        | 0.27           | 4.80E-05       |
| 5xFAD STIM1 KD | 0.27     | 1              | 0.75           |
| 5xFAD STIM2 KD | 4.80E-05 | 0.75           | 1              |

Supplement Table S10. Dunn's test pair wise comparison for normalized **peak** values for 5xFAD neurons with STIM1 KD (5xFAD STIM1 KD) treated with nifedipine (Nif) and ML 218 (ML) (Figure 5C)

|                      | 5xFAD STIM1 KD | 5xFAD STIM1 KD + Nif | 5xFAD STIM1 KD + ML |
|----------------------|----------------|----------------------|---------------------|
| 5xFAD STIM1 KD       | 1              | 4.40E-05             | 3.00E-06            |
| 5xFAD STIM1 KD + Nif | 4.40E-05       | 1                    | 0.74                |
| 5xFAD STIM1 KD + ML  | 3.00E-06       | 0.74                 | 1                   |

Supplement Table S11. Dunn's test pair wise comparison for normalized **AUC** values for 5xFAD neurons with STIM1 KD (5xFAD STIM1 KD) treated with nifedipine (Nif) and ML 218 (ML) (Figure 5C)

|                      | 5xFAD STIM1 KD | 5xFAD STIM1 KD + Nif | 5xFAD STIM1 KD + ML |
|----------------------|----------------|----------------------|---------------------|
| 5xFAD STIM1 KD       | 1              | 6.63E-09             | 2.10E-05            |
| 5xFAD STIM1 KD + Nif | 6.63E-09       | 1                    | 1                   |
| 5xFAD STIM1 KD + ML  | 2.14E-05       | 1                    | 1                   |

Supplement Table S12. Dunn's test pair wise comparison for normalized **peak** values for 5xFAD neurons with STIM2 KD (5xFAD STIM2 KD) treated with nifedipine (Nif) and ML 218 (ML) (Figure 5D)

|                      | 5xFAD STIM2 KD | 5xFAD STIM2 KD + Nif | 5xFAD STIM2 KD + ML |
|----------------------|----------------|----------------------|---------------------|
| 5xFAD STIM2 KD       | 1              | 0.0022               | 1                   |
| 5xFAD STIM2 KD + Nif | 0.0022         | 1                    | 0.037               |
| 5xFAD STIM2 + ML     | 1              | 0.037                | 1                   |

Supplement Table S13. Dunn's test pair wise comparison for normalized **AUC** values for 5xFAD neurons with STIM2 KD (5xFAD STIM2 KD) treated with nifedipine (Nif) and ML 218 (ML) (Figure 5D)

|                      | 5xFAD STIM2 KD | 5xFAD STIM2 KD + Nif | 5xFAD STIM2 KD + ML |
|----------------------|----------------|----------------------|---------------------|
| 5xFAD STIM2 KD       | 1              | 8.20E-05             | 0.09                |
| 5xFAD STIM2 KD + Nif | 8.20E-05       | 1                    | 0.06                |
| 5xFAD STIM2 KD + ML  | 0.09           | 0.06                 | 1                   |

Supplement Table S14. Statistics for Supplement Figure 1.

| Type of Data     | Mean±SEM  | N  | Statistics                              |
|------------------|-----------|----|-----------------------------------------|
| WT anti-STIM1    | 1.0±0.06  | 10 | diff = -0.04 (-4%)<br>p = 0.67 (t-test) |
| 5xFAD anti-STIM1 | 0.96±0.06 | 7  |                                         |

|                  |           |    |                                   |
|------------------|-----------|----|-----------------------------------|
|                  |           |    |                                   |
| WT anti-STIM2    | 1.0±0.05  | 16 | diff = 0.016<br>p = 0.86 (t-test) |
| 5xFAD anti-STIM2 | 1.02±0.07 | 23 |                                   |
